# Supplementary material
Source: publisher figshare collection journal article supplement (https://springernature.figshare.com/ndownloader/files/22955915)
Supplement: Supplementary file 1 [file 22955915]

Additional file 7: Figure S6.

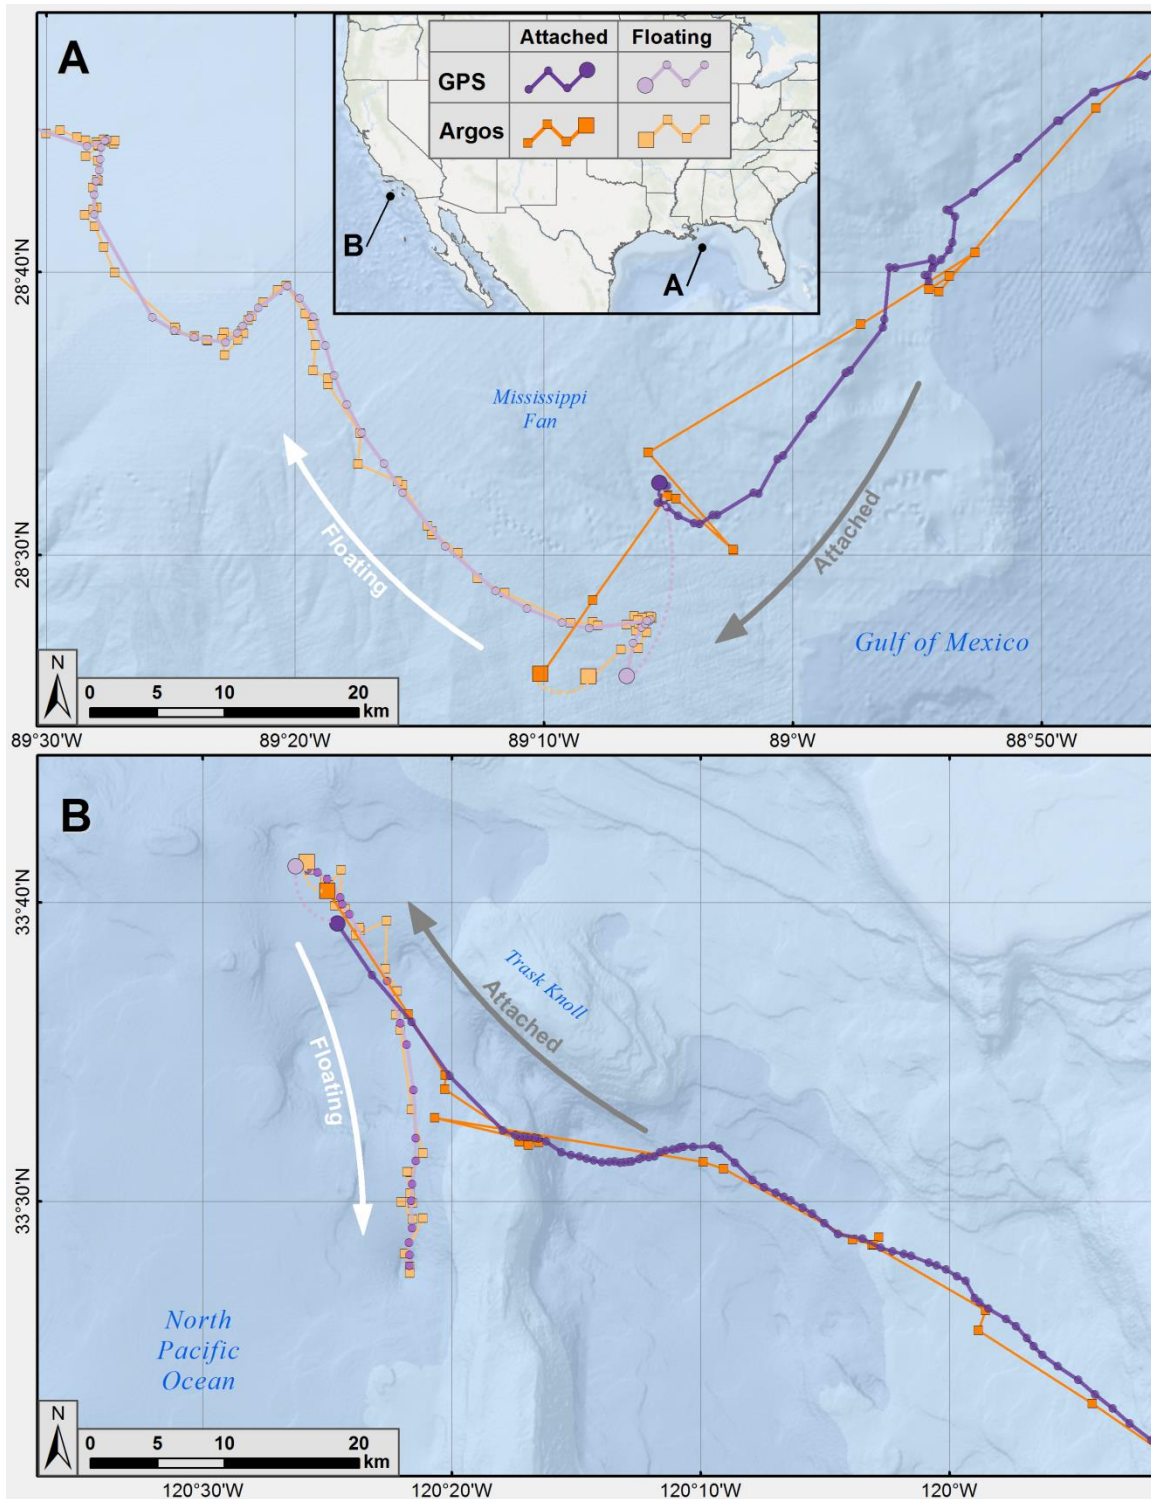

Simultaneously collected Argos and Fastloc GPS locations for an ADB tag attached to a sperm whale in the northern Gulf of Mexico (A), and to a blue whale off southern California (B). Each panel shows a portion of the track while the tag was attached to a whale (dark colors) followed by the floating period prior to recovery after releasing from the whale (light colors). Fine dashed lines connect the last attached location and the first floating location. Arrows show the direction of travel for each track portion.
